# Supplementary material for: Field emission properties of spinel ZnCo2O4microflowers
Source: Royal Society of Chemistry journal article supplement (doi:10.1039/c4ra10246k), 2014-12-11
Supplement: c4ra10246k1.pdf [file c4ra10246k1.pdf]

# Electronic Supplementary Materials

## **Field emission properties of spinel $\text{ZnCo}_2\text{O}_4$ Microflowers**

Satyajit Ratha,<sup>1</sup> Ruchita T. Khare,<sup>2</sup> Mahendra A. More,<sup>2</sup> Ranjit Thapa,<sup>3</sup> Dattatray J. Late,<sup>4,\*</sup> and Chandra Sekhar Rout<sup>1,\*</sup>

<sup>1</sup>*School of Basic Sciences, Indian Institute of Technology, Bhubaneswar 751013, India*

*\*Email: csrout@iitbbs.ac.in*

<sup>2</sup>*Department of Physics, University of Pune, Pune-411007, India*

<sup>3</sup>*SRM Research Institute, SRM University, Kattankulathur, Chennai 603203, Tamil Nadu, India*

<sup>4</sup>*Physical & Materials Chemistry Division, CSIR-National Chemical Laboratory, Dr. Homi Bhabha Road, Pashan, Pune 411008, India*

*\*Email: dj.late@ncl.res.in / datta099@gmail.com*

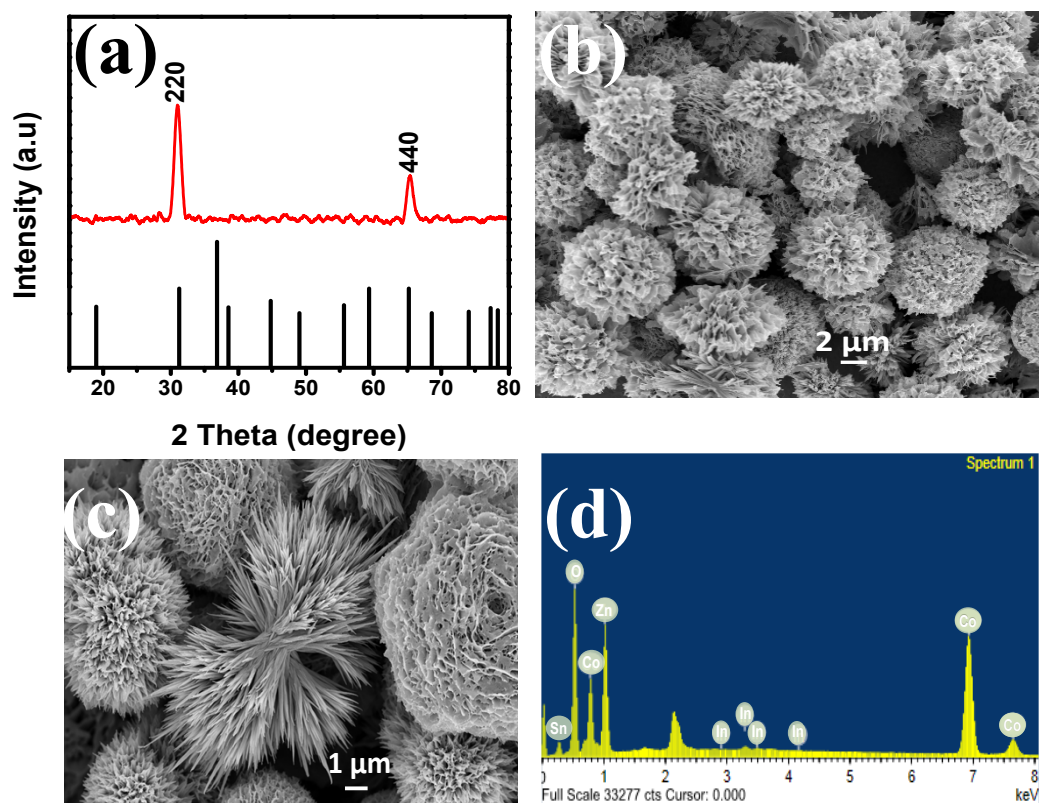

**Fig. 1: (a) XRD pattern of  $\text{ZnCO}_2\text{O}_4$  grown on ITO coated with ZnO seed layer showing preferential growth along 220. Low (b) and high (c) magnification FESEM images of the sample. (d) EDS spectra showing composition of the sample and traces of substrate.**
